# Supplementary material for: Characterisation and Classification of Foodborne Bacteria Using Reflectance FTIR Microscopic Imaging
Source: MDPI journal article supplement (doi:10.3390/molecules26206318), 2021-10-19
Supplement: s1 [file s1]

Supplementary Material

# Characterisation and Classification of Foodborne Bacteria Using Reflectance FTIR Microscopic Imaging

Jun-Li Xu <sup>1</sup>, Ana Herrero-Langreo <sup>1</sup>, Sakshi Lamba <sup>2,3</sup>, Mariateresa Ferone <sup>2</sup>, Amalia G. M. Scannell <sup>2,3</sup>, Vicky Caponigro <sup>1,3</sup> and Aoife A. Gowen <sup>1,\*</sup>

<sup>1</sup> School of Biosystems and Food Engineering, University College Dublin, Belfield, Dublin 4, Ireland; junli.xu@ucd.ie (J.-L.X.); ana.herrero-langreo@ucd.ie (A.H.-L.); vicky.caponigro@ucd.ie (V.C.)

<sup>2</sup> School of Agriculture and Food Science, University College Dublin, Belfield, Dublin 4, Ireland; sakshi.lamba@ucdconnect.ie (S.L.); mariateresa.ferone@ucd.ie (M.F.); amalia.scannell@ucd.ie (A.G.M.S.)

<sup>3</sup> Institute of Food and Health, University College Dublin, Belfield, Dublin 4, Ireland

\* Correspondence: aoife.gowen@ucd.ie

**Table S1.** Cell counts obtained for selected dry cell samples deposited on stainless steel and aluminium.

| Sample set                                 | OD    | Cell counts (logCFU/ml) |           |
|--------------------------------------------|-------|-------------------------|-----------|
|                                            |       | EC                      | BS        |
| On mirror stainless steel (09–10 Sep 2020) | 0.1   | 5.75                    | 3.72      |
|                                            | 0.001 | 4.45                    | 1.00      |
|                                            | 10    | 8.60–8.70               | 7.00–7.60 |
| On mirror aluminium slide (23–24 Sep 2020) | 1     | 7.91–7.85               | 6.48–6.66 |
|                                            | 0.1   | 6.81–6.86               | 3.34–3.68 |
|                                            | 0.01  | 5.41–5.58               | 1.78–2.04 |
|                                            | 0.001 | 3.52–3.60               | 1.00–1.30 |

Note: OD: optical density; EC: Escherichia coli; BS: Bacillus subtilis.

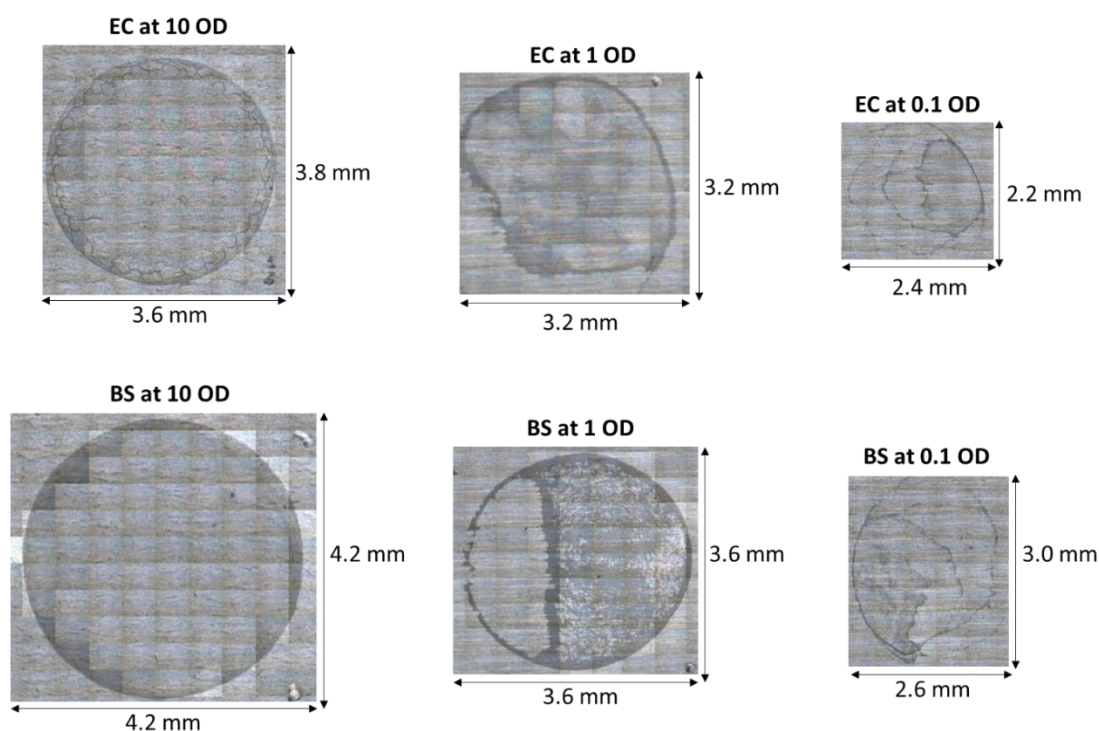

**Figure S1.** Microscopic images of EC and BS at 10 OD, 1 OD and 0.1 OD.

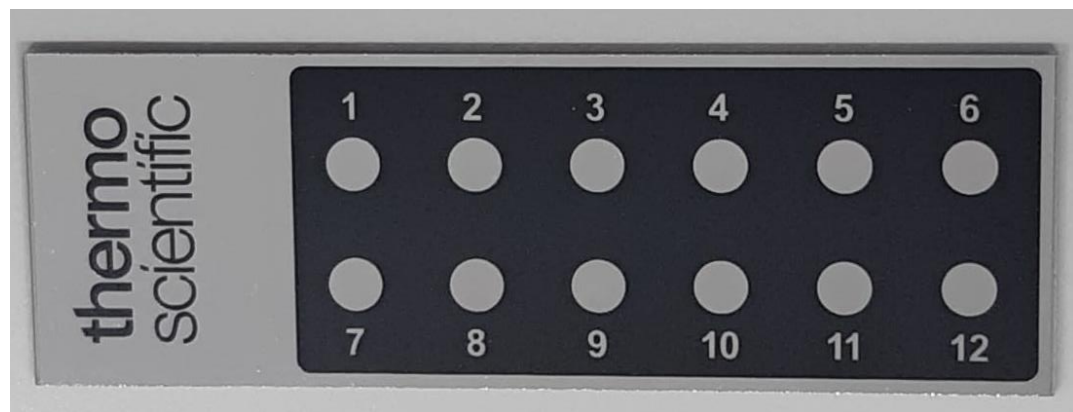

**Figure S2.** A picture of an empty mirror aluminium slide. The wells are labelled with numbers. For a certain bacterial strain, 10 OD concentration are located at 1 and 7, 1 OD at 2 and 8, 0.1 OD at 3 and 9, 0.01 OD at 4 and 10, 0.001 OD at 5 and 11, while 6 and 12 are empty.

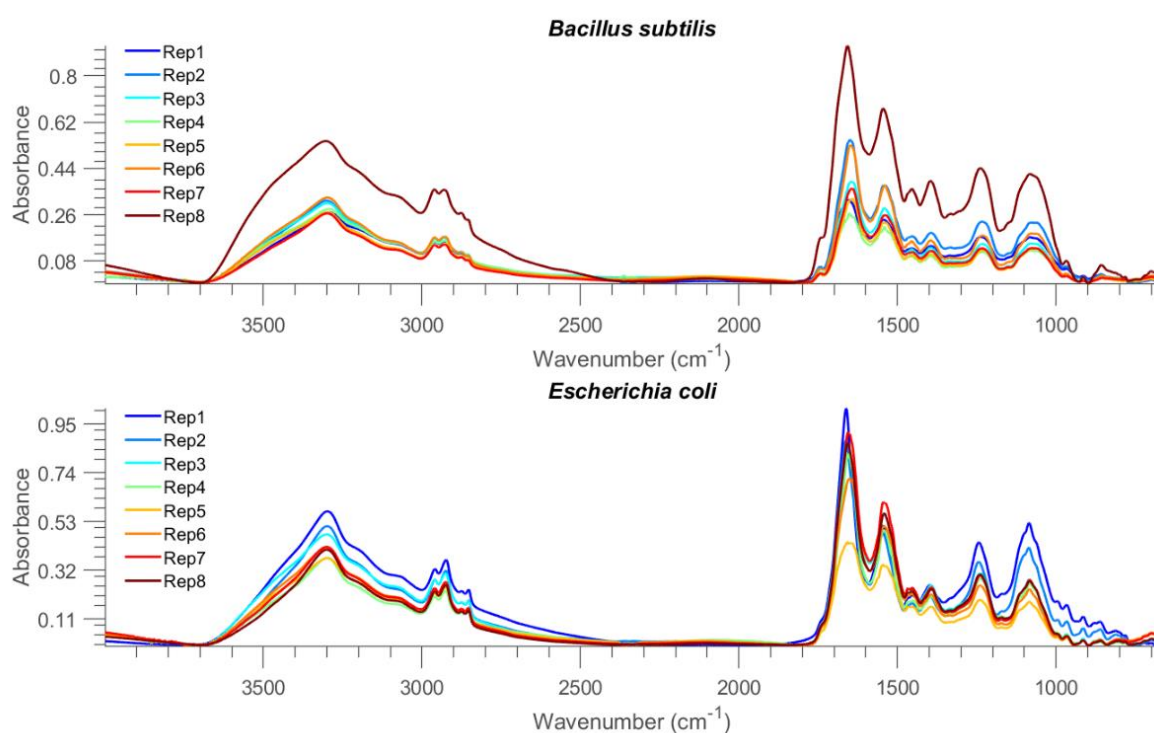

**Figure S3.** Mean spectra of each replicate sample at 10 OD deposited on stainless steel. Rep: replicate.

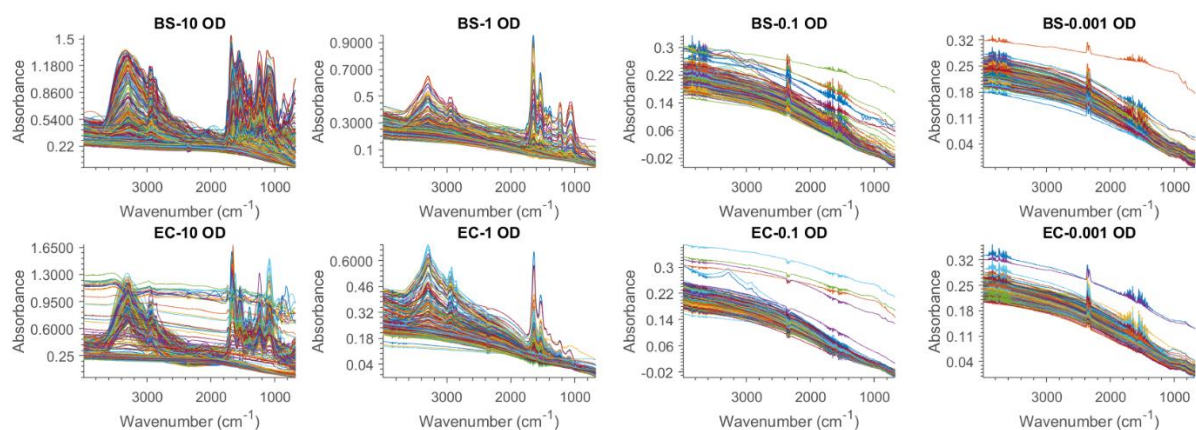

**Figure S4.** Pixel spectra (including both bacterial and stainless steel pixels) without any pre-processing extracted from one sample image of each concentration deposited on stainless steel.

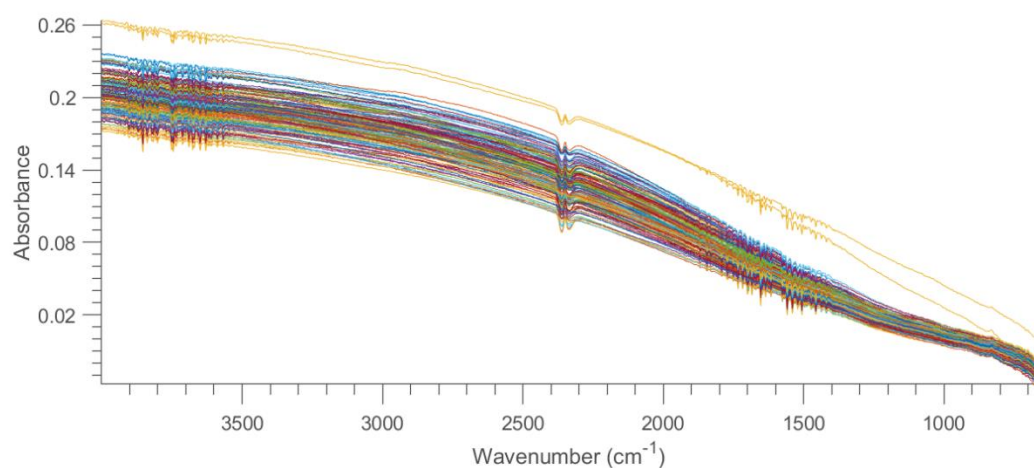

**Figure S5.** Pixel spectra of stainless steel.

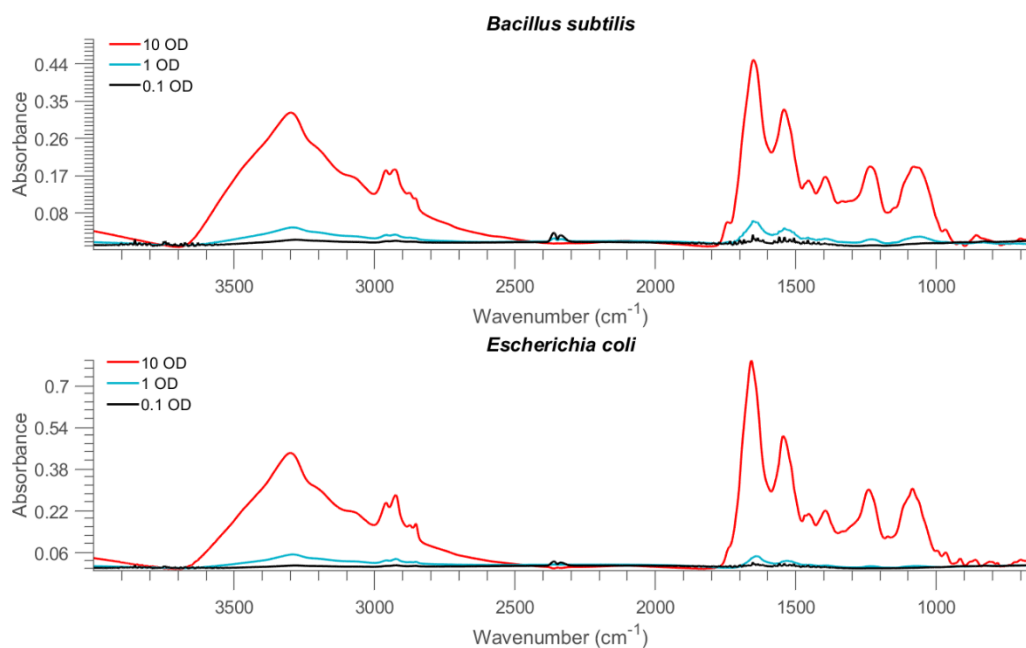

**Figure S6.** Mean spectra of all bacterial cells from concentrations of 10 OD, 1 OD and 0.1 OD deposited on stainless steel.

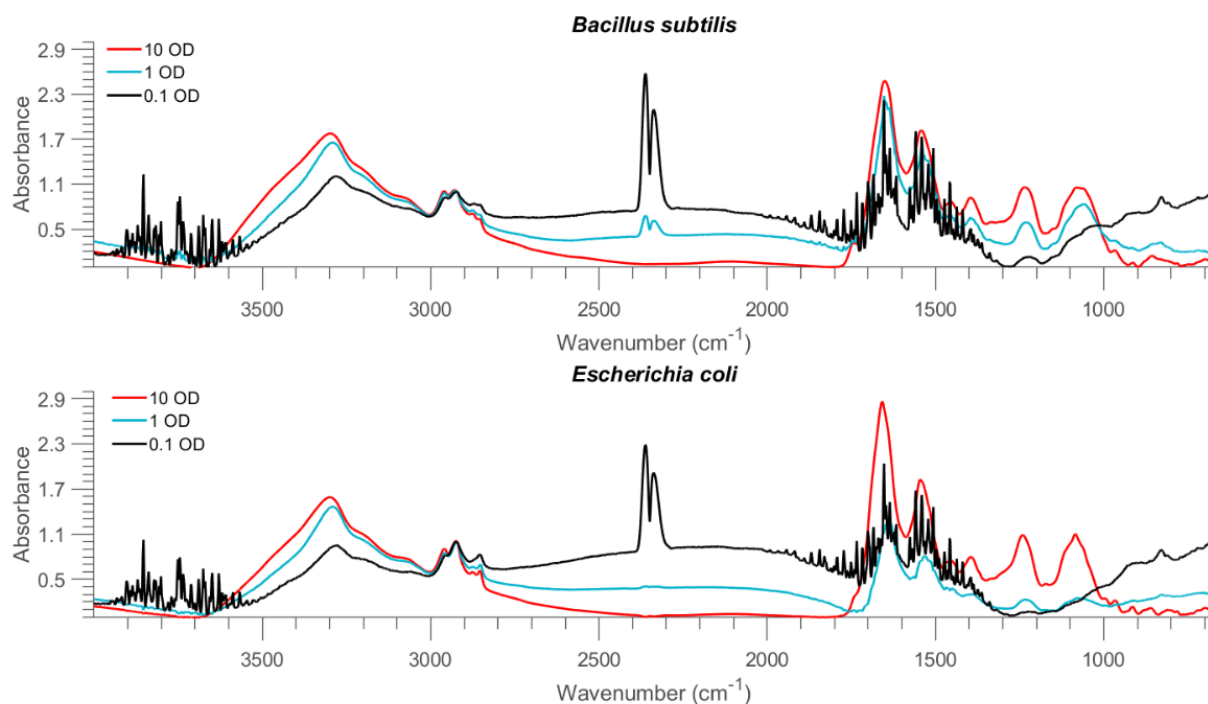

**Figure S7.** Normalized mean spectra of all bacterial cells from concentrations of 10 OD, 1 OD and 0.1 OD deposited on stainless steel. Normalization is performed by dividing the intensity at 2926  $\text{cm}^{-1}$ .

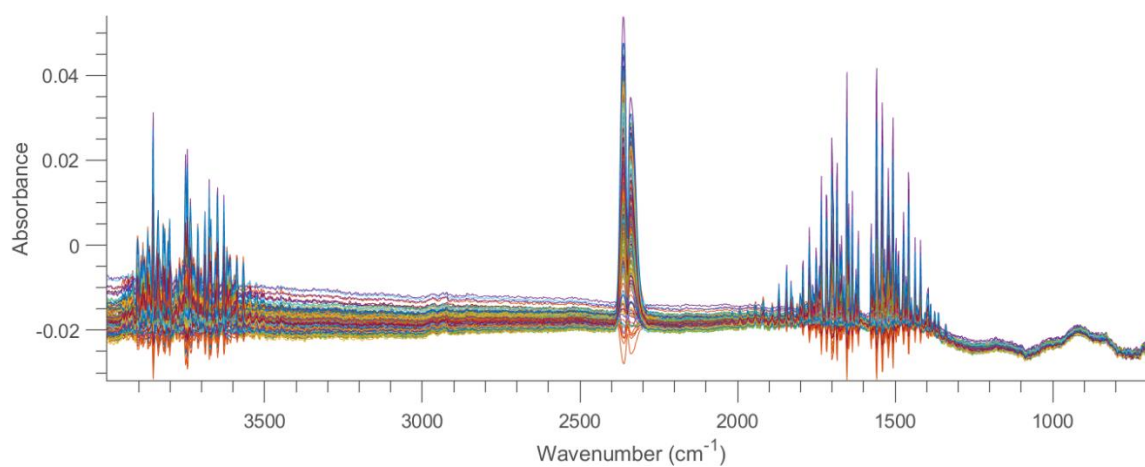

**Figure S8.** Pixel spectra of mirror aluminium slide.

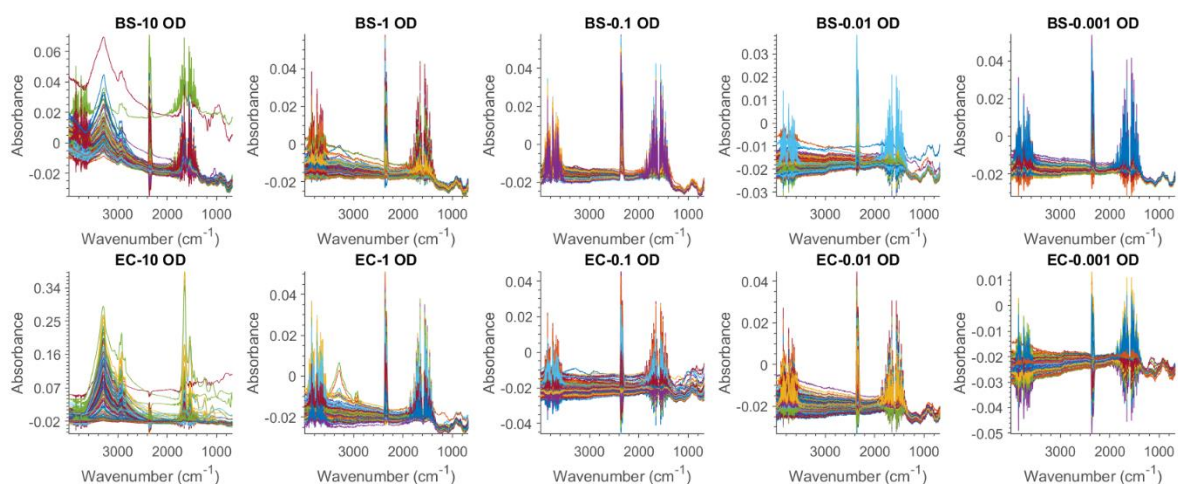

**Figure S9.** Pixel spectra without any pre-processing extracted from one sample of each concentration deposited on mirror aluminium slide.

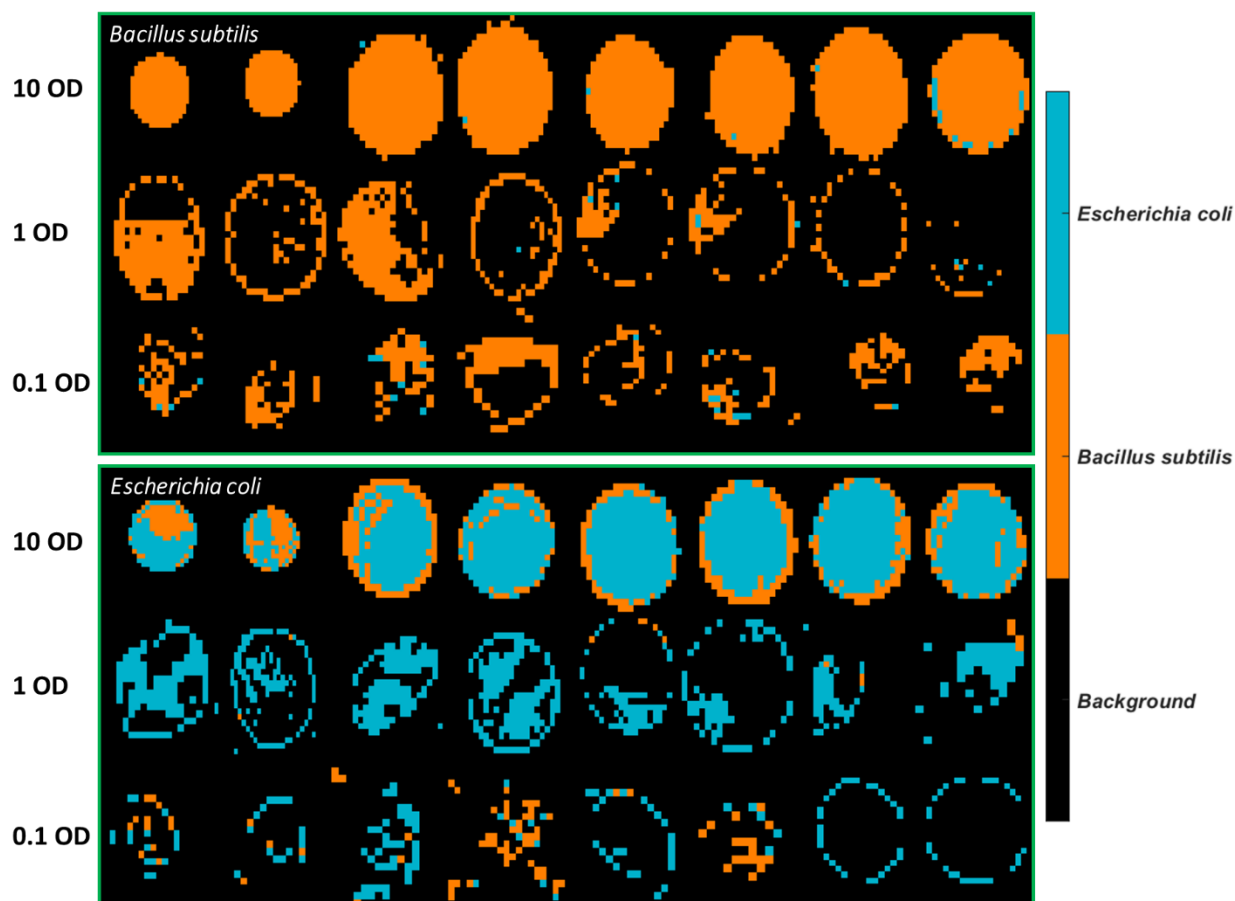

**Figure S10.** Classification maps obtained from the SVM model using 3500–2600  $\text{cm}^{-1}$  for samples deposited on STS with the Set 2 (1 OD) data as the training set. BS: *Bacillus subtilis*; EC: *Escherichia coli*.

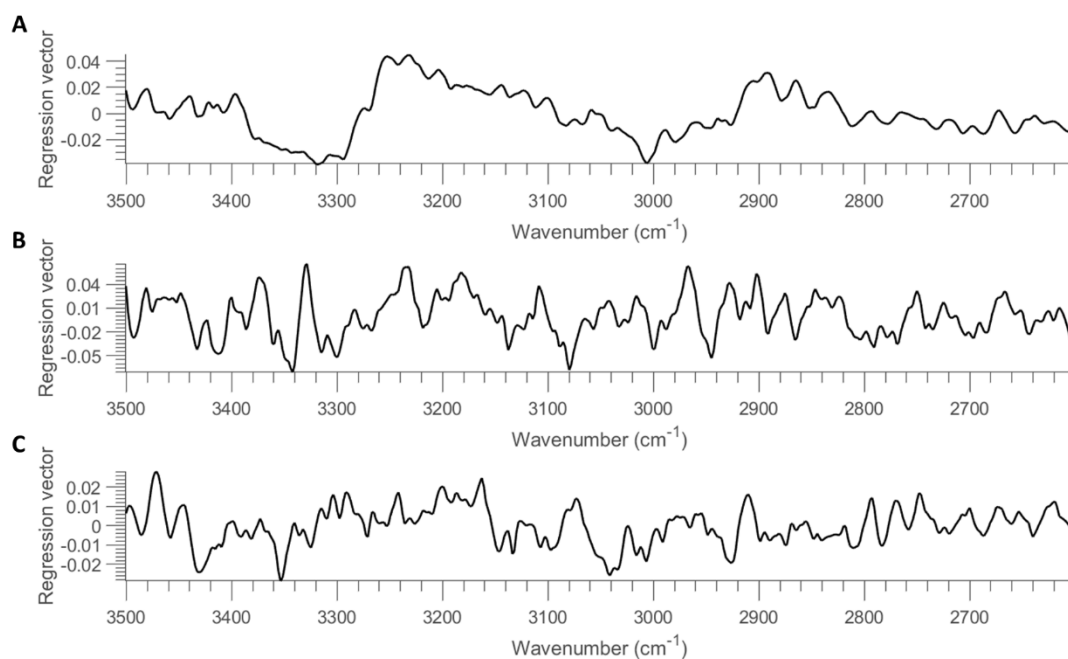

**Figure S11.** Regression vectors of PLSDA models (using 3500–2600  $\text{cm}^{-1}$  range after SNV pre-treatment) built from (A) 10 OD, (B) 1 OD and (C) 0.1 OD samples deposited on Al.
